# Supplementary material for: What Does Carotenoid-Dependent Coloration Tell? Plasma Carotenoid Level Signals Immunocompetence and Oxidative Stress State in Birds–A Meta-Analysis
Source: PubMed Central journal article supplement (PMC3419220; doi:10.1371/journal.pone.0043088), 2012-08-14

trait redness x antibody response

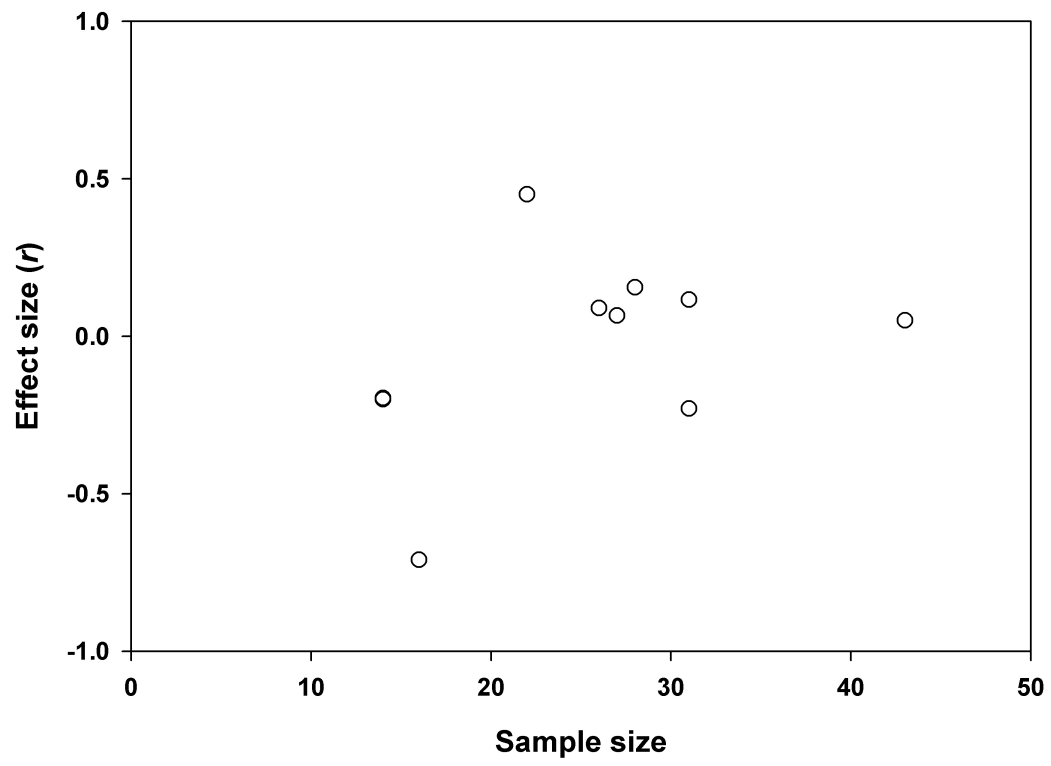

trait redness x H:L ratio

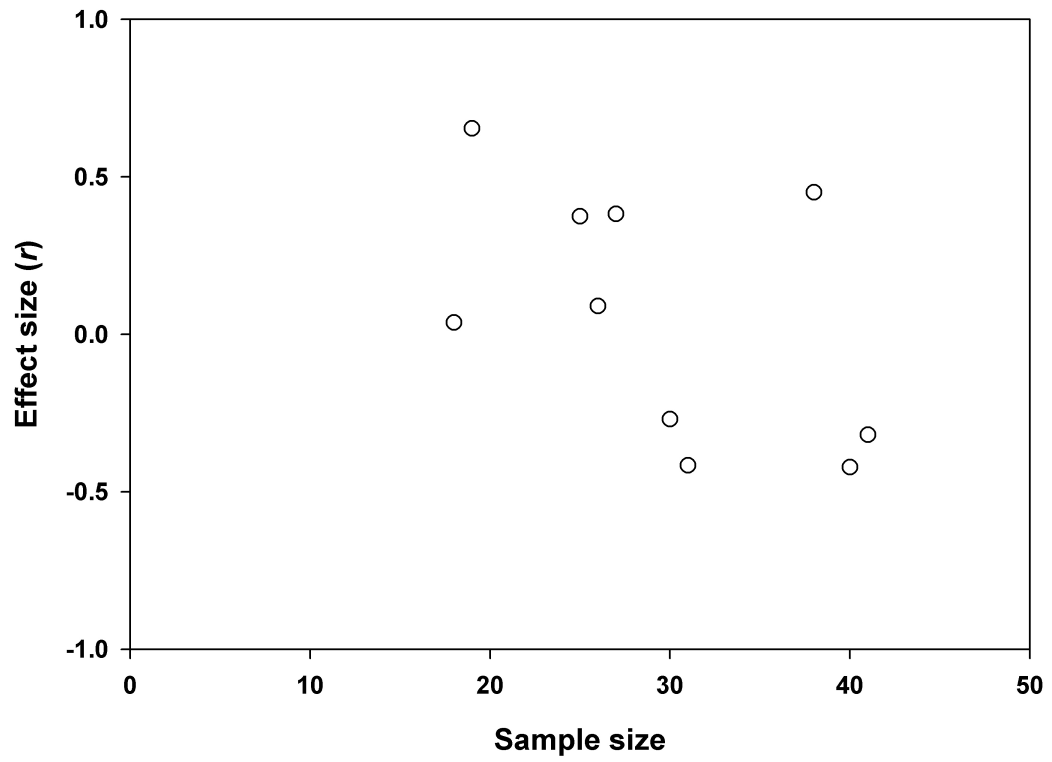

trait redness x parasite load

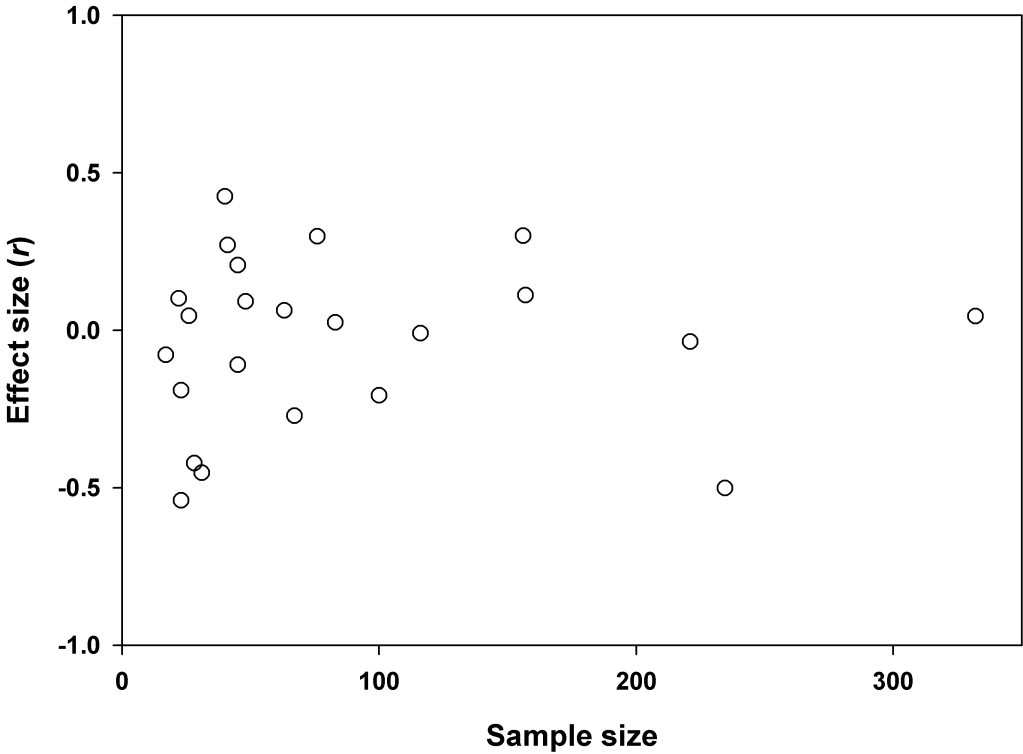

trait redness x PHA response

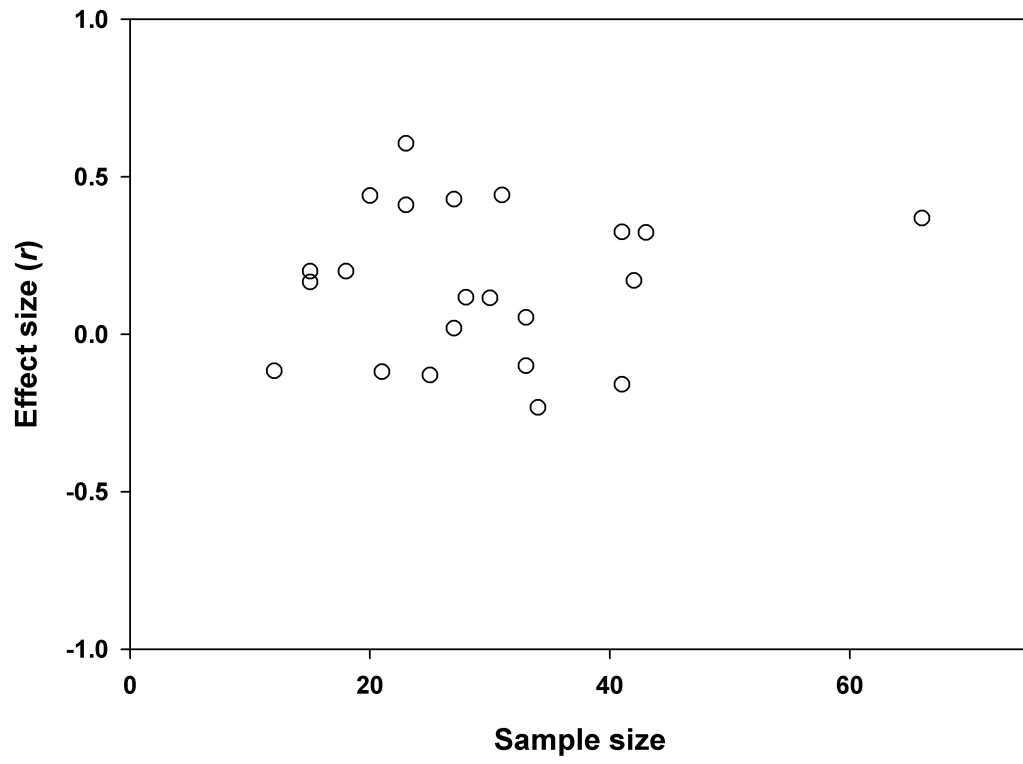

trait redness x white blood cell count

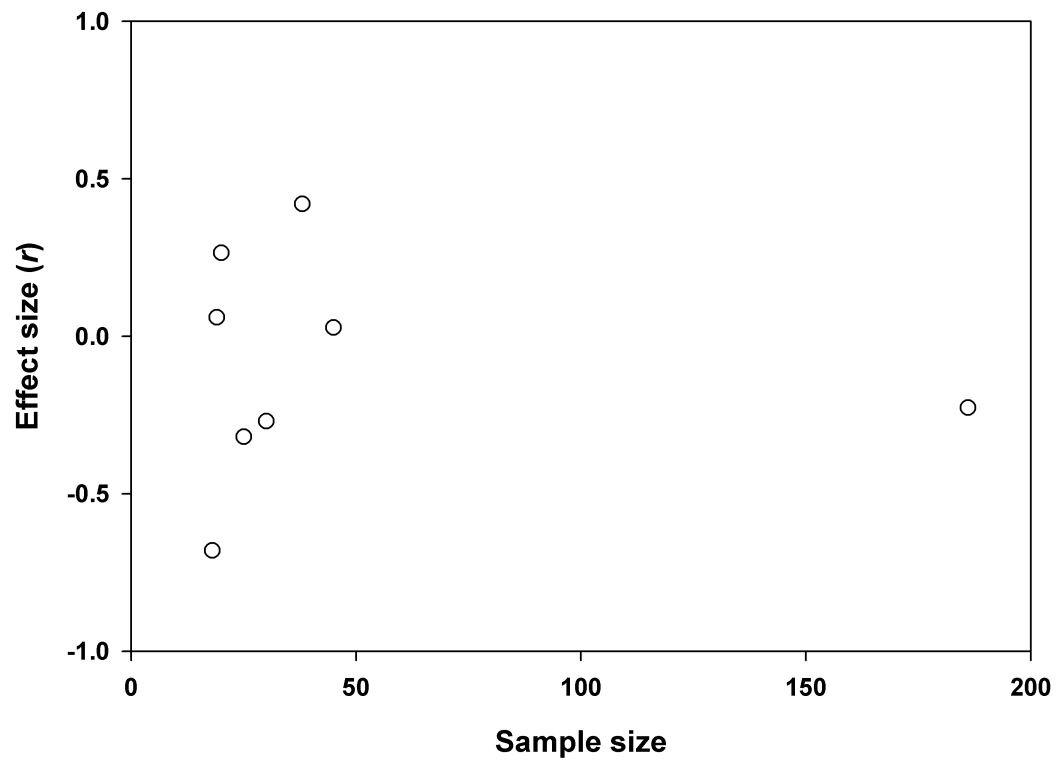

trait redness x antioxidant capacity

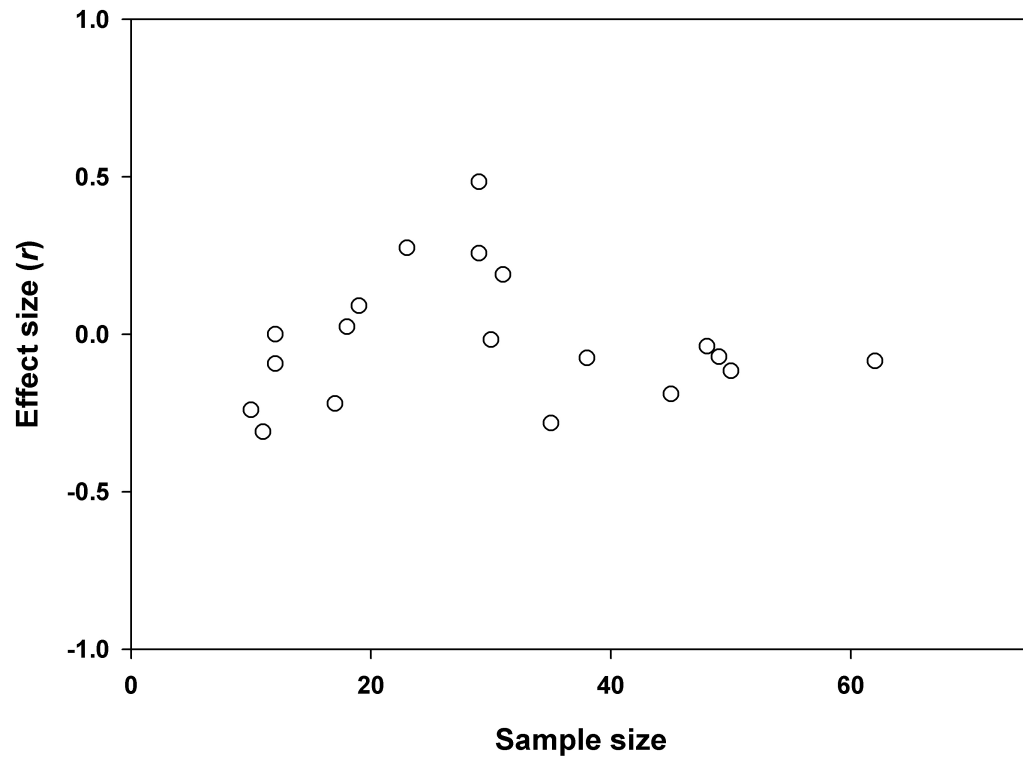

trait redness x oxidative damage

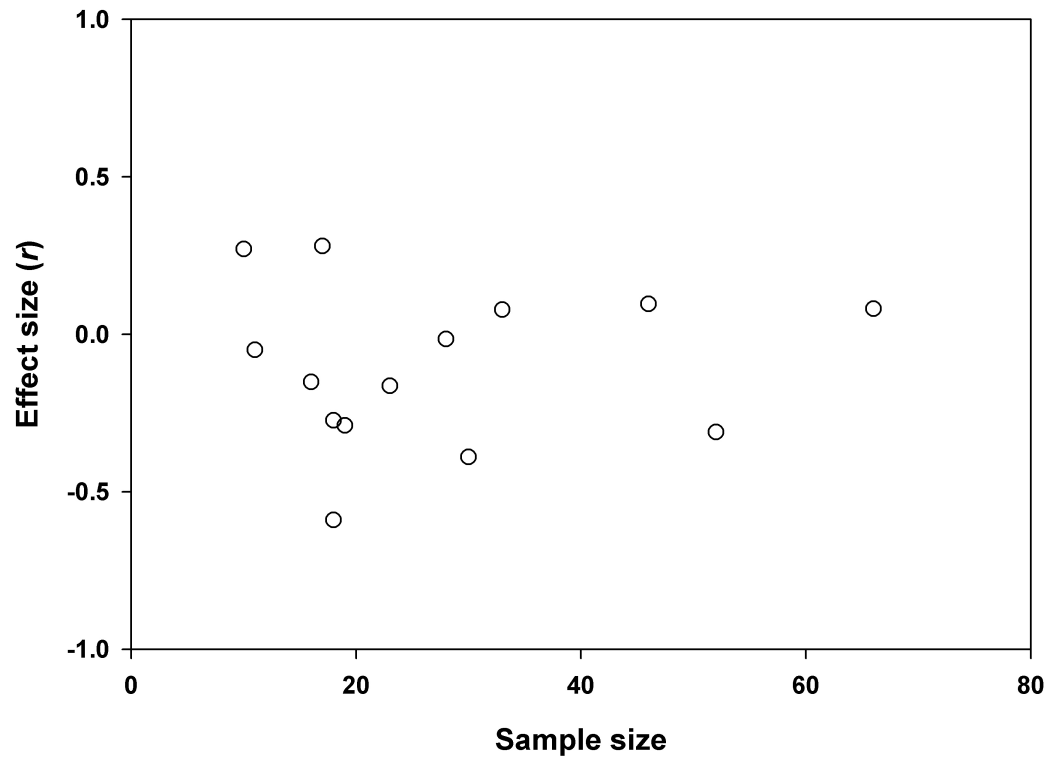

carotenoids x trait redness

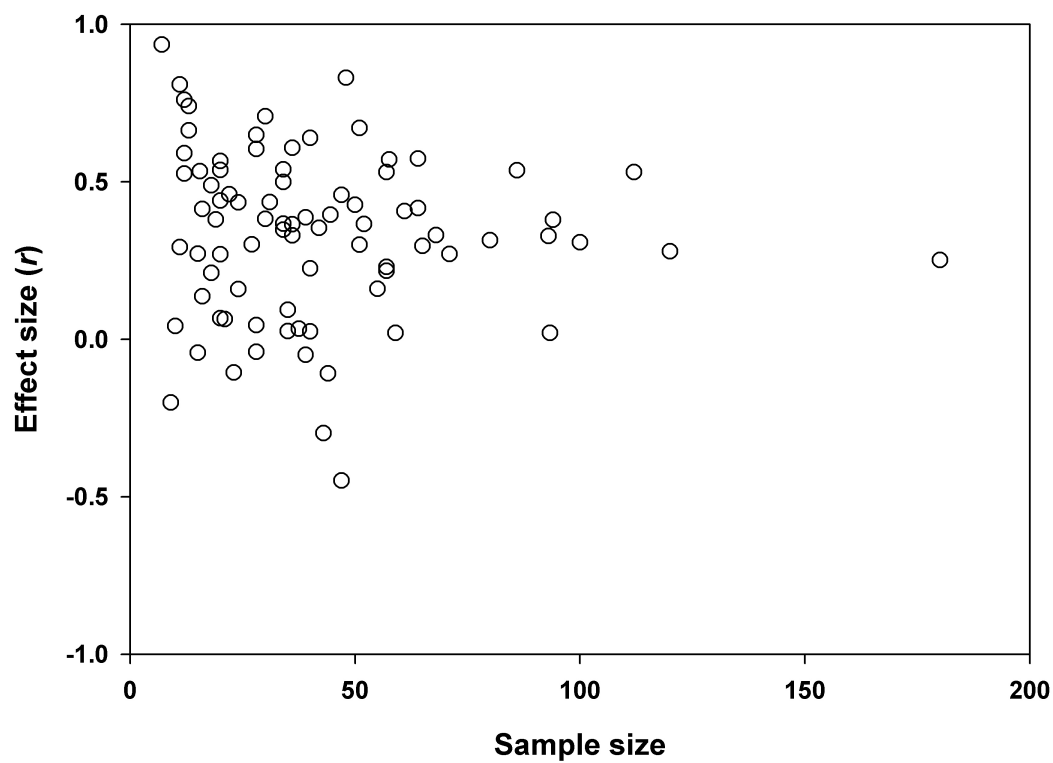



carotenoids x antibody response

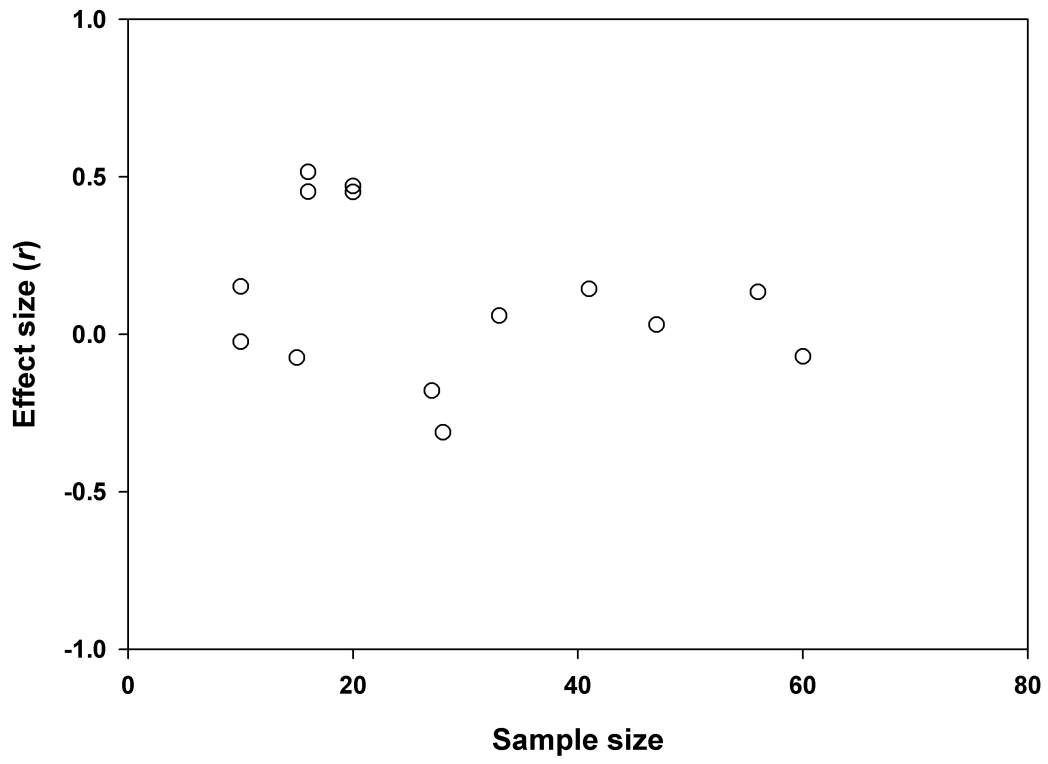

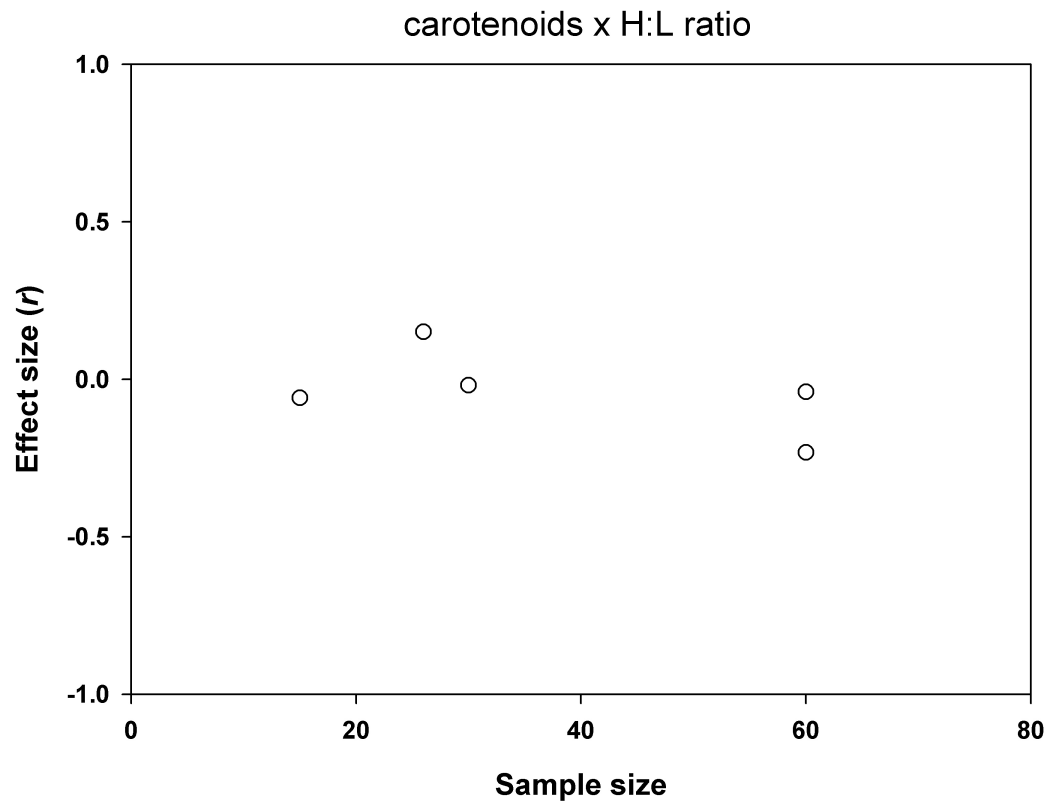

carotenoids x parasite load

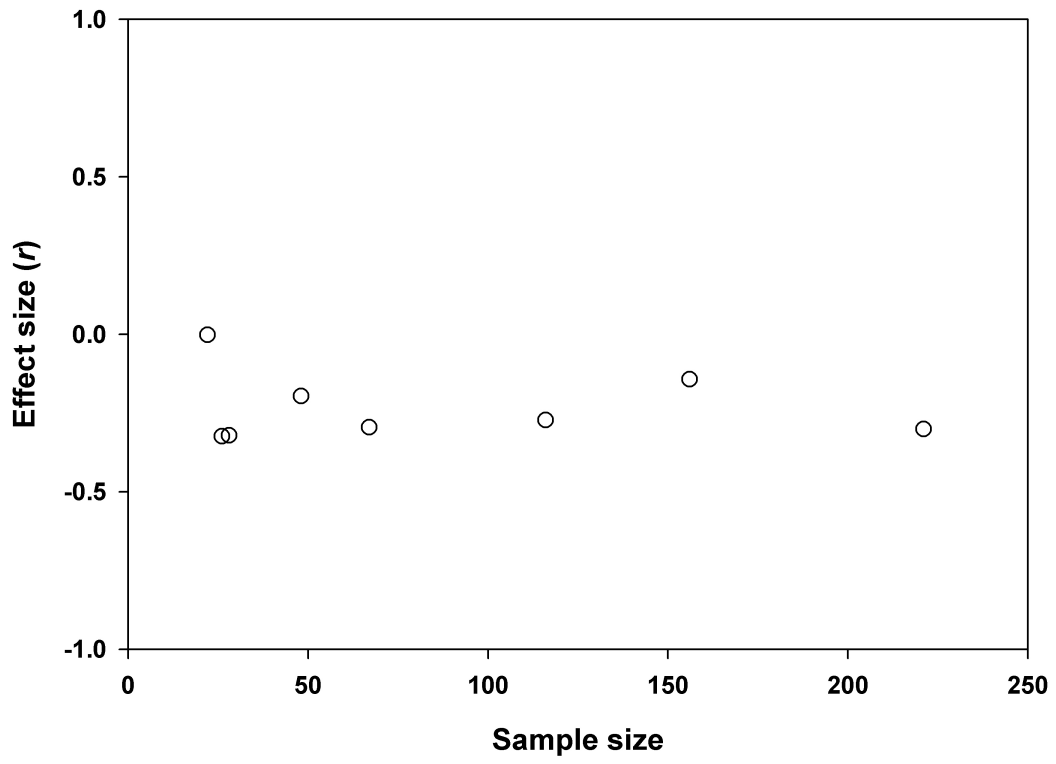

carotenoids x PHA response

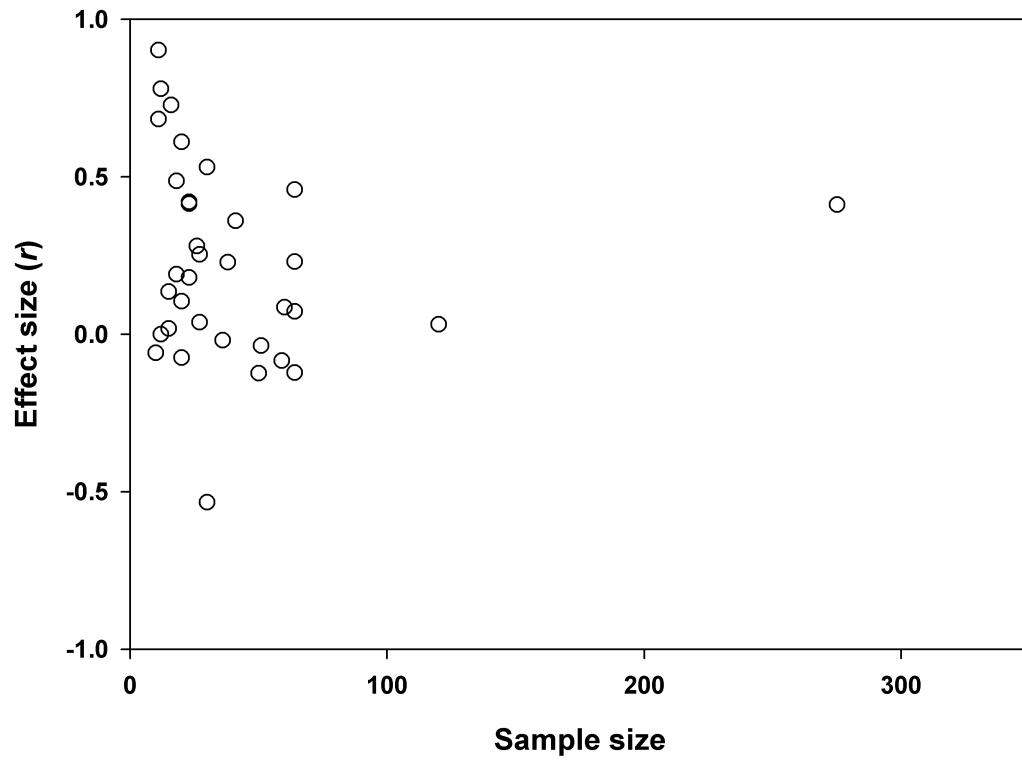

carotenoids x white blood cell count

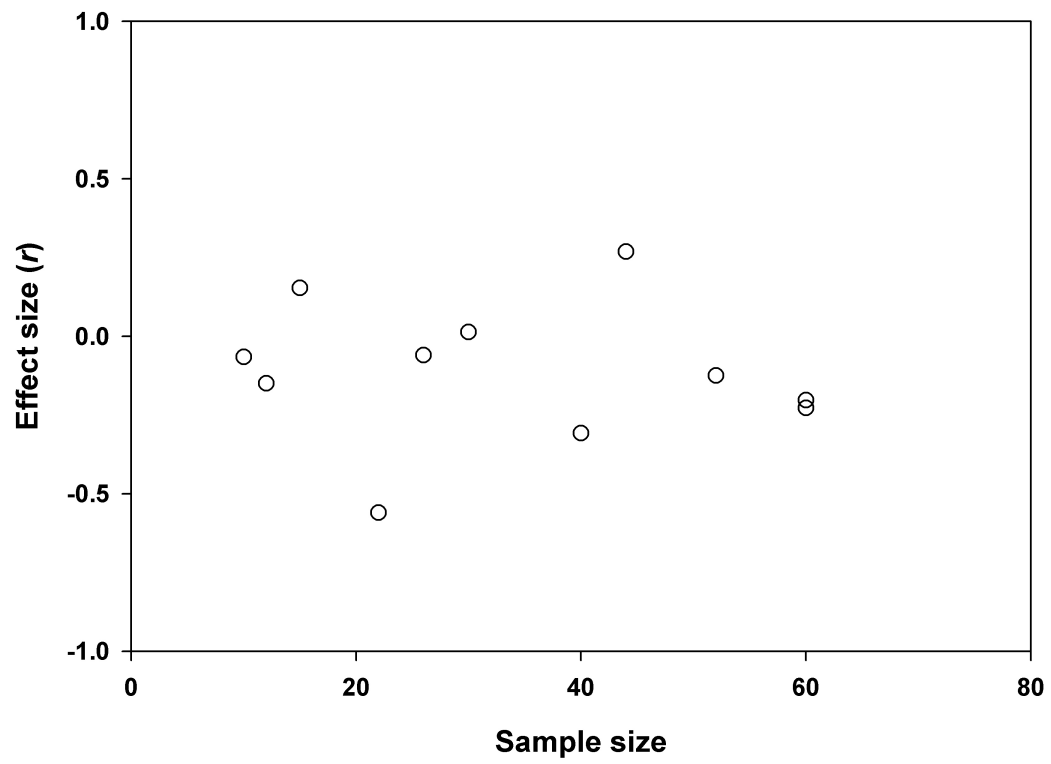

carotenoids x antioxidant capacity

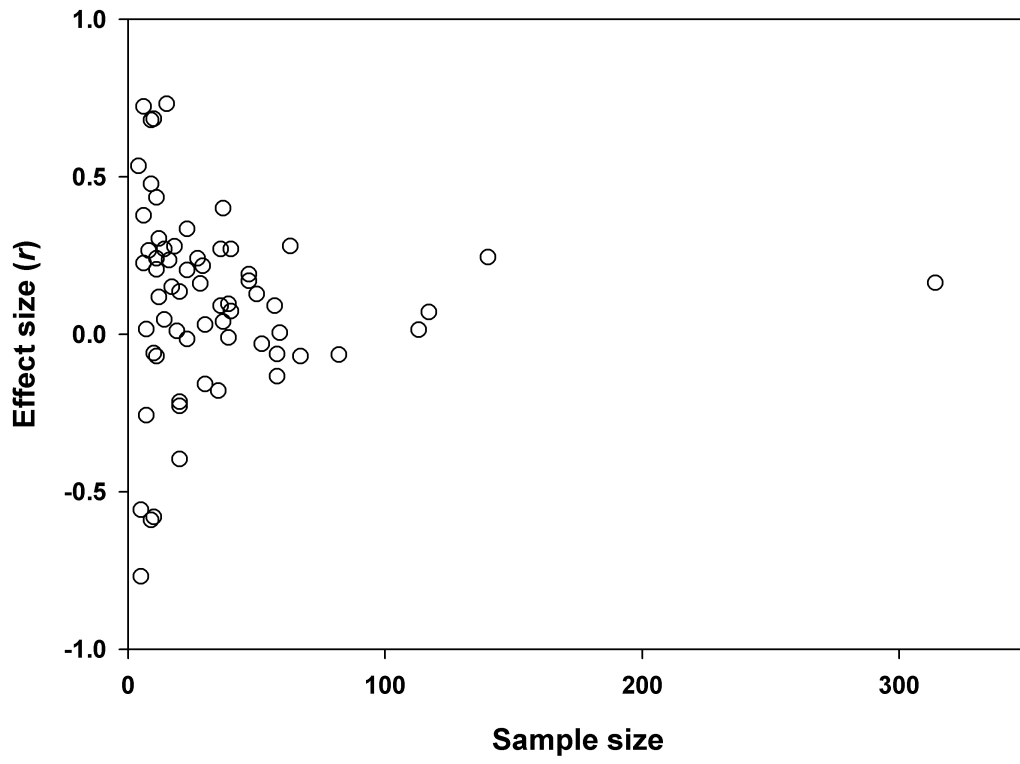

carotenoids x oxidative damage

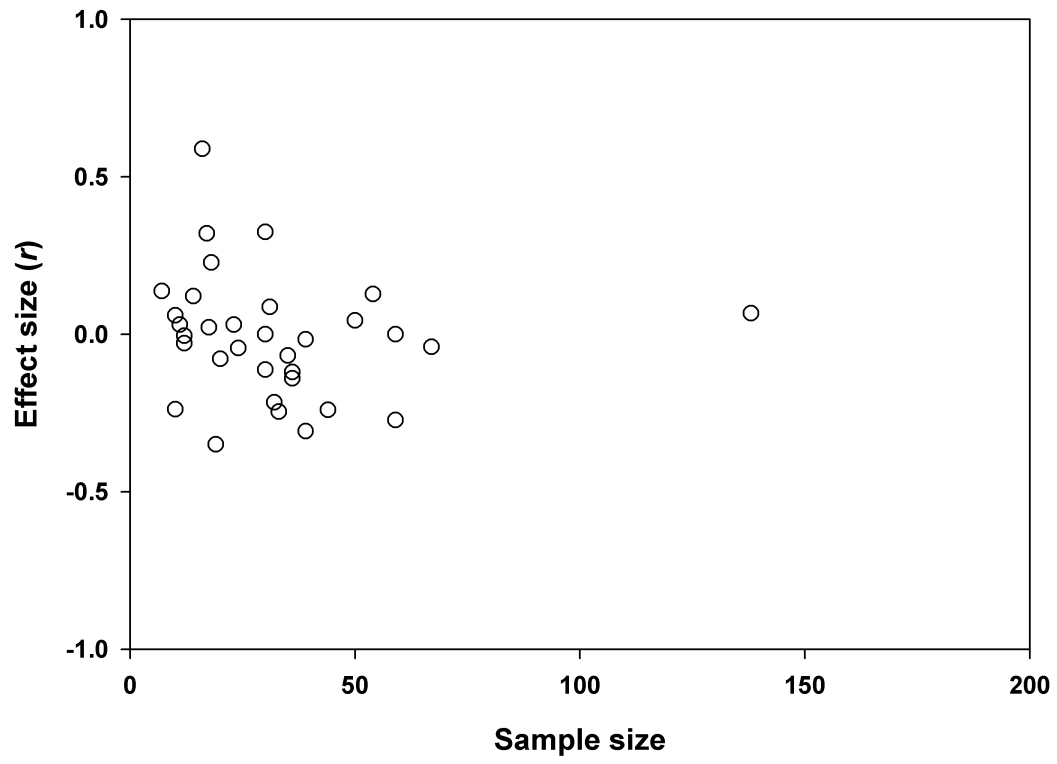

Supplement: pone.0043088.s001.pdf [file pone.0043088.s001.pdf]
