# Supplementary material for: What Does Carotenoid-Dependent Coloration Tell? Plasma Carotenoid Level Signals Immunocompetence and Oxidative Stress State in Birds–A Meta-Analysis
Source: PubMed Central journal article supplement (PMC3419220; doi:10.1371/journal.pone.0043088), 2012-08-14
Supplement: pone.0043088.s003.pdf [file pone.0043088.s003.pdf]

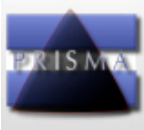

## PRISMA 2009 Flow Diagram

Title corresponding manuscript: Higher carotenoid availability signals higher immunocompetence and lowered oxidative stress state in birds – a meta-analysis

### Search terms in Google Scholar:

("immune function" OR immunocompetence OR "antioxidant capacity" OR "oxidative damage" OR signal) AND (bird) AND (carotenoid OR carotenoids)

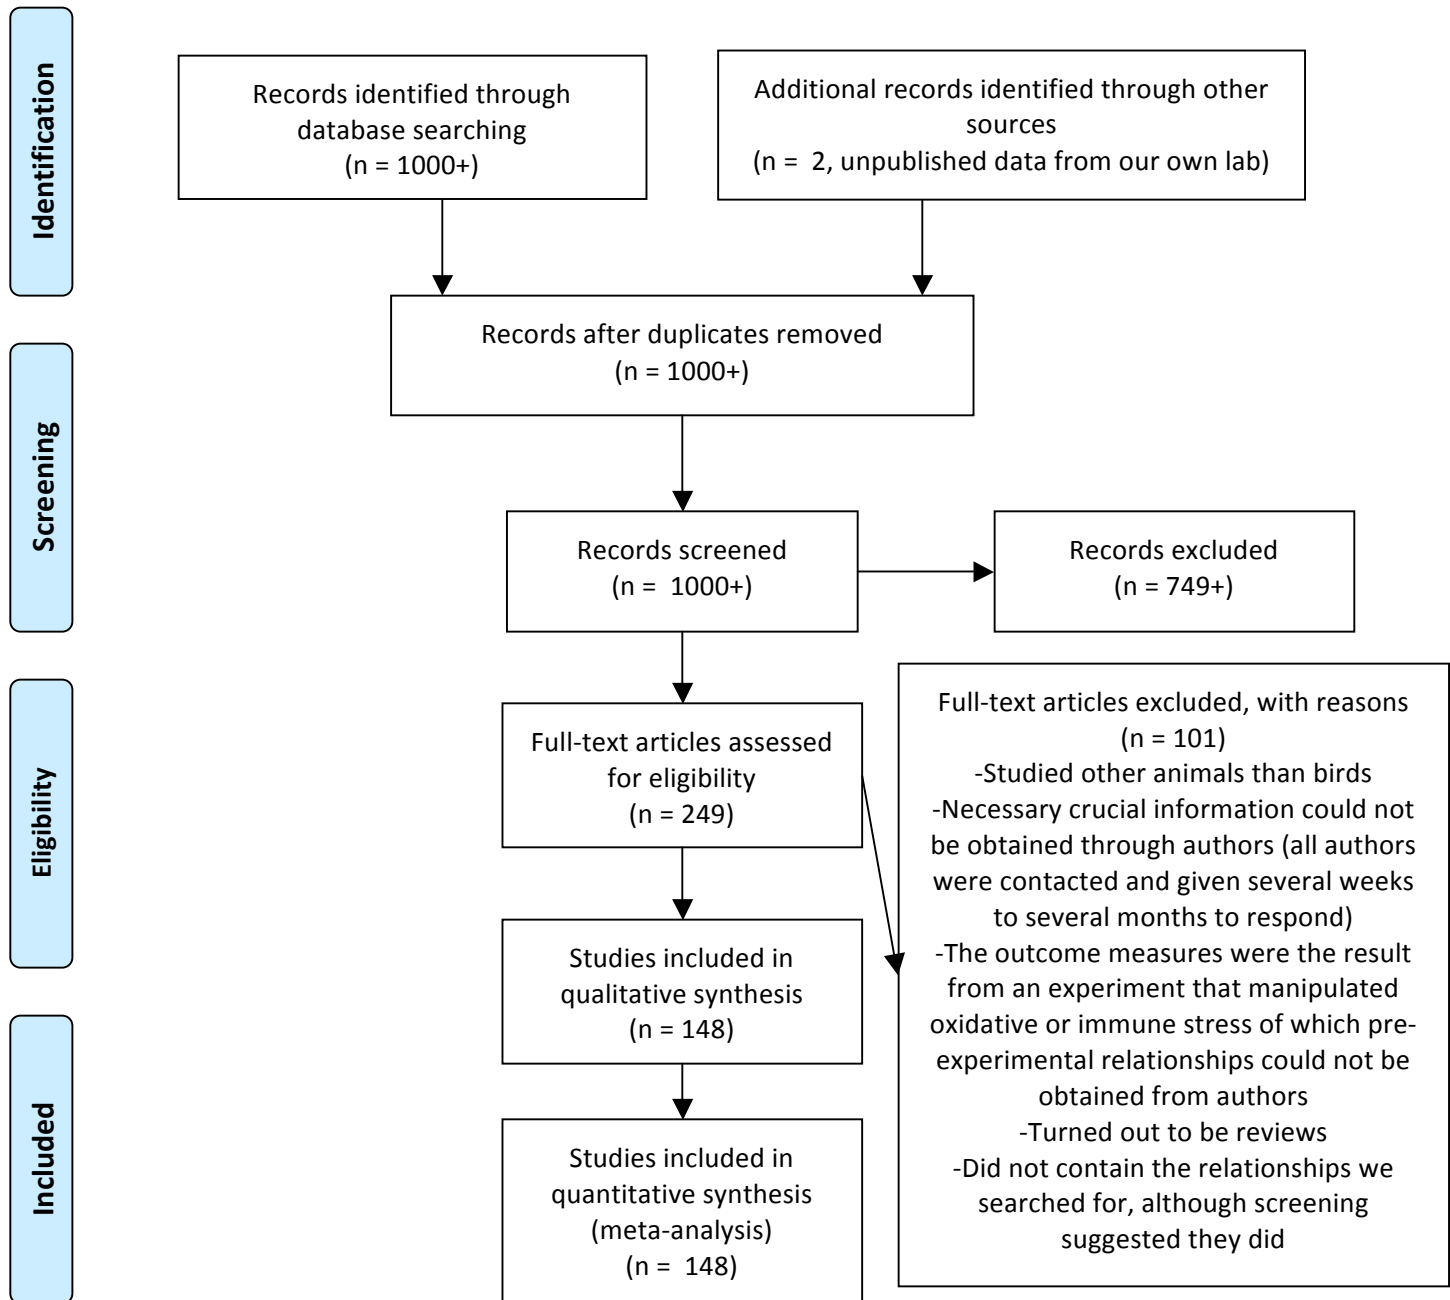

From: Moher D, Liberati A, Tetzlaff J, Altman DG, The PRISMA Group (2009). Preferred Reporting Items for Systematic Reviews and Meta-Analyses: The PRISMA Statement. PLoS Med 6(6): e1000097. doi:10.1371/journal.pmed1000097

For more information, visit [www.prisma-statement.org](http://www.prisma-statement.org).
